# Supplementary material for: Mantle plume and rift-related volcanism during the evolution of the Rio Grande Rise
Source: Springer Nature journal article supplement (doi:10.1038/s43247-022-00349-1), 2022-02-07
Supplement: MOESM2 [file 43247_2022_349_MOESM2_ESM.pdf]

## **Description of Additional Supplementary Files**

**File Name:** Supplementary Data 1

**Description:** Major and trace element compositions of volcanic rock samples from the Eastern Rio Grande Rise, Western Rio Grande Rise, Jean Charcot Seamount Chain and Deep Sea Drilling Site (DSDP) Site 516.
