# Supplementary material for: Mantle plume and rift-related volcanism during the evolution of the Rio Grande Rise
Source: Springer Nature journal article supplement (doi:10.1038/s43247-022-00349-1), 2022-02-07
Supplement: MOESM3 [file 43247_2022_349_MOESM3_ESM.xlsx]

## Sheet: RGR
Supplementary Data 1: Major and trace element compositions of volcanic rock samples from the Eastern Rio Grande Rise, Western Rio Grande Rise, Jean Charcot Seamount Chain and Deep Sea Drilling Site (DSDP) Site 516.
Sample ID	Location	Latitude	Longitude	Depth (m)	SiO2	TiO2	Al2O3	FeOT	MnO	MgO	CaO	Na2O	K2O	P2O5	LOI	Total	Li	Sc	V	Cr	Co	Ni	Cu	Zn	Rb	Sr	Y	Zr	Nb	Mo	Sn	Cs	Ba	La	Ce	Pr	Nd	Sm	Eu	Gd	Tb	Dy	Ho	Er	Tm	Yb	Lu	Hf	Ta
MSM82-6-DR-1	Eastern Rio Grande Rise	-34.1561	-30.1525	3311	51.92	2.006	13.85	11	0.1946	6.45	6.43	3.494	0.44	0.4424	3.58	96.227	79.48	42.68	360.2	24.79	38.55	52.13	220.4	172.6	6.497	196.8	23.19	91.22	10.98	0.7144	0.7917	0.744	61.44	10.42	23.6	3.224	14.85	3.97	1.471	4.562	0.7514	4.851	0.9725	2.803	0.3949	2.598	0.3622	2.617	0.6794
MSM82-6-DR-2	Eastern Rio Grande Rise	-34.1561	-30.1525	3311	46.95	1.832	15.4	11.9	0.1782	7.376	9.219	3.237	0.5666	0.3062	2.84	96.965	63.03	42.55	389.7	44.63	49.27	62.85	213.7	131.5	44.84	197.7	26.83	94.05	10.11	0.464	0.8193	8.195	57.88	9.537	20.57	3.07	14.27	3.989	1.479	4.679	0.7915	5.093	1.061	3.007	0.4271	2.774	0.3971	2.564	0.6357
MSM82-6-DR-5	Eastern Rio Grande Rise	-34.1561	-30.1525	3311	47.41	1.939	15.04	10.94	0.1608	7.827	9.41	3.052	0.5344	0.3533	3.12	96.6665	78	45.15	361.1	121.8	39.92	67.32	191.8	102.5	6.283	207.8	24.11	94.69	10.72	0.3277	0.9399	0.532	57.22	9.912	20.76	3.149	14.5	3.88	1.441	4.423	0.7307	4.691	0.9633	2.736	0.3824	2.493	0.3477	2.663	0.6869
MSM82-6-DR-20	Eastern Rio Grande Rise	-34.1561	-30.1525	3311	47.19	1.572	14.7	11.91	0.1859	7.685	10.39	2.95	0.4277	0.2215	2.57	97.2321	62.17	43.56	347.3	98.99	51.97	76.29	194	127.9	15.47	190.2	24.33	76.19	8.22	0.5903	0.7733	2.118	43.5	7.792	16.99	2.584	12.22	3.469	1.315	4.191	0.7128	4.628	0.9685	2.763	0.3893	2.514	0.3603	2.217	0.5295
MSM82-6-DR-42	Eastern Rio Grande Rise	-34.1561	-30.1525	3311	47.92	1.951	16.63	11.21	0.1381	4.822	11.59	2.925	0.7417	0.3338	1.53	98.2616	17.9	37.32	363.4	57.94	45.93	52.37	172.5	84.24	12.98	275.5	26.69	123.7	11.98	0.5983	1.096	1.03	143.9	12.5	30.35	3.969	17.88	4.66	1.713	5.184	0.8553	5.478	1.098	3.146	0.4409	2.91	0.4072	3.215	0.732
MSM82-6-DR-48	Eastern Rio Grande Rise	-34.1561	-30.1525	3311	46.89	2.107	14.37	13.57	0.1695	6.65	8.769	3.399	0.7732	0.4134	2.69	97.1111	56.66	43.69	421.8	24.88	37.68	35.02	183.2	130.4	18.52	191.5	30.09	105.6	12.37	0.3535	1.055	1.503	96.97	10.2	23.09	3.341	15.55	4.388	1.614	5.233	0.8913	5.815	1.211	3.482	0.4935	3.258	0.4601	3.019	0.8094
MSM82-7-DR-1	Eastern Rio Grande Rise	-34.1658	-30.1636	3870	46.11	1.649	13.86	13.33	0.1307	6.669	7.491	2.827	1.606	0.2262	5.93	93.8989	n.a.	n.a.	n.a.	n.a.	n.a.	n.a.	n.a.	n.a.	n.a.	n.a.	n.a.	n.a.	n.a.	n.a.	n.a.	n.a.	n.a.	n.a.	n.a.	n.a.	n.a.	n.a.	n.a.	n.a.	n.a.	n.a.	n.a.	n.a.	n.a.	n.a.	n.a.	n.a.	n.a.
MSM82-7-DR-2	Eastern Rio Grande Rise	-34.1658	-30.1636	3870	45.69	2.052	14.21	12.87	0.1749	6.727	9.507	2.993	0.6202	0.3319	4.63	95.176	45.53	42.61	411.4	35	44.18	54.66	237.7	119.4	30.68	204	25.9	99.11	12.15	0.4847	1.037	5.163	67.29	10.81	25.14	3.55	16.54	4.453	1.639	5.146	0.8438	5.414	1.086	3.102	0.436	2.86	0.4001	2.798	0.7506
MSM82-7-DR-4	Eastern Rio Grande Rise	-34.1658	-30.1636	3870	46.56	2.174	13.93	13.96	0.1703	6.8	8.995	3.225	0.7759	0.335	2.87	96.9252	56.91	42.85	414.3	21.65	58.22	55.93	117.8	137.4	11.9	197.4	29.9	101.8	12.7	0.4524	1.038	0.6026	71.81	13.11	26.64	3.806	17.38	4.66	1.701	5.591	0.9458	6.173	1.265	3.689	0.5261	3.461	0.4973	2.846	0.7807
MSM82-7-DR-5	Eastern Rio Grande Rise	-34.1658	-30.1636	3870	46.23	1.617	14.48	11.88	0.1541	6.743	8.625	2.981	1.735	0.3028	5.08	94.7479	n.a.	n.a.	n.a.	n.a.	n.a.	n.a.	n.a.	n.a.	n.a.	n.a.	n.a.	n.a.	n.a.	n.a.	n.a.	n.a.	n.a.	n.a.	n.a.	n.a.	n.a.	n.a.	n.a.	n.a.	n.a.	n.a.	n.a.	n.a.	n.a.	n.a.	n.a.	n.a.	n.a.
MSM82-8-DR-1	Eastern Rio Grande Rise	-34.2447	-30.1744	5283	47	2.473	13.28	11.77	0.1744	6.403	5.033	3.647	0.8453	0.4695	8.68	91.0952	n.a.	n.a.	n.a.	n.a.	n.a.	n.a.	n.a.	n.a.	n.a.	n.a.	n.a.	n.a.	n.a.	n.a.	n.a.	n.a.	n.a.	n.a.	n.a.	n.a.	n.a.	n.a.	n.a.	n.a.	n.a.	n.a.	n.a.	n.a.	n.a.	n.a.	n.a.	n.a.	n.a.
MSM82-10-DR-1	Eastern Rio Grande Rise	-33.8014	-30.6972	2109	48.86	2.16	14.63	12.97	0.1922	5.401	10.84	2.968	0.7399	0.3542	0.68	99.1153	23.01	42.64	403.3	59.78	55.52	52.55	174.5	98.38	17.12	251.2	30.3	130.8	12.92	0.8364	1.237	1.615	139.8	13.49	33.12	4.318	19.43	5.125	1.874	5.813	0.9748	6.266	1.266	3.63	0.5157	3.352	0.4783	3.475	0.7951
MSM82-10-DR-2	Eastern Rio Grande Rise	-33.8014	-30.6972	2109	48.06	1.949	16.76	10.72	0.1313	4.727	11.5	2.889	0.6539	0.2953	2.12	97.6855	14.22	38.18	347.6	60.86	45.41	58.46	160.3	82.76	10.49	269.7	29.81	135.9	12.29	0.6179	1.201	0.7032	134.1	12.66	29.04	4.044	18.49	4.887	1.768	5.54	0.9229	5.892	1.21	3.423	0.4815	3.133	0.4457	3.628	0.8089
MSM82-10-DR-3	Eastern Rio Grande Rise	-33.8014	-30.6972	2109	48.24	2.264	14.87	11.05	0.1883	5.716	10.23	3.098	0.778	0.3898	2.98	96.8241	34.47	42.44	381.5	54.87	43.12	40.93	194.7	110	25.16	248.4	33.65	161.4	14.06	0.5354	1.434	2.025	128.8	13.82	32.34	4.583	21.11	5.684	2.013	6.388	1.059	6.7	1.362	3.81	0.5309	3.427	0.4876	4.332	0.9361
MSM82-10-DR-4	Eastern Rio Grande Rise	-33.8014	-30.6972	2109	48.38	2.134	14.41	12.9	0.1759	5.72	11.13	2.987	0.7071	0.329	0.92	98.873	14.67	42.06	394	67.5	50.19	58.15	183.4	94.93	12.37	245.1	30.1	131.3	12.71	0.6066	1.218	0.9687	150.6	13.47	32.44	4.253	19.33	5.116	1.843	5.84	0.9669	6.246	1.256	3.618	0.5118	3.334	0.474	3.522	0.793
MSM82-11-DR-1	Eastern Rio Grande Rise	-33.7014	-30.8633	1341	45.12	2.02	15.74	10.32	0.1378	6.673	13.15	2.952	0.9126	0.343	2.37	97.3684	48.81	37.69	310	162.4	45.17	66.26	181.5	87.45	17.18	302.7	27.49	149.7	12.56	0.5057	1.241	0.9695	153.6	16.01	35.6	4.759	20.83	5.073	1.779	5.386	0.8653	5.402	1.091	3.063	0.4232	2.768	0.3895	3.824	0.8149
MSM82-11-DR-2	Eastern Rio Grande Rise	-33.7014	-30.8633	1341	42.7	2.176	16.2	10.34	0.1333	6.465	12.68	3.296	1.055	0.3918	4.21	95.4371	67.32	39.42	305	174.9	49.86	83.19	225.7	98.62	21.8	302.8	27.61	160.6	13.24	0.6452	1.33	1.606	162.3	16.39	36.85	4.961	21.82	5.33	1.87	5.698	0.9109	5.658	1.136	3.16	0.4385	2.827	0.3959	4.12	0.8748
MSM82-11-DR-3	Eastern Rio Grande Rise	-33.7014	-30.8633	1341	44.21	2.042	15.88	11.5	0.2189	8.711	9.289	2.491	0.9259	0.5189	3.92	95.7867	93.65	36.75	297.4	94.84	57.12	117.2	108.8	118.3	21.27	845	29.83	172.9	13.97	2.278	1.422	1.629	171	21.38	45.26	5.959	25.66	5.915	2.007	6.087	0.9487	5.826	1.153	3.176	0.4296	2.736	0.3831	4.443	0.8856
MSM82-11-DR-4	Eastern Rio Grande Rise	-33.7014	-30.8633	1341	47.33	1.952	15.72	10.51	0.1518	6.288	10.85	2.667	0.8418	0.3935	3.11	96.7041	41.52	36.68	301.8	88.74	44.87	51.06	93.03	92.99	17.87	357.1	28.27	170.1	13.72	0.617	1.41	1.364	166.5	19.84	44.14	5.801	24.8	5.807	1.977	5.888	0.9263	5.693	1.131	3.113	0.4268	2.759	0.3854	4.344	0.8852
MSM82-11-DR-5	Eastern Rio Grande Rise	-33.7014	-30.8633	1341	48.06	2.03	15.8	10.58	0.147	5.74	11.39	2.958	0.8194	0.3273	1.94	97.8517	33.1	37.31	316.4	84.24	44.83	46.83	113.4	90.36	13.85	356.8	26.24	166.8	14.03	0.6554	1.385	1.102	199.9	20.59	48.98	5.985	25.57	5.872	2.02	5.919	0.9243	5.672	1.098	3.041	0.4183	2.689	0.372	4.184	0.8472
MSM82-11-DR-6	Eastern Rio Grande Rise	-33.7014	-30.8633	1341	46.03	1.965	15.99	9.361	0.1291	6.486	11.14	2.764	0.7693	0.3674	4.77	95.0018	54.85	38.74	318	161.9	52.11	75.95	177.8	89.23	17.71	298.4	27.6	155.4	12.98	0.5596	1.317	1.287	162.7	15.99	36.39	4.908	21.52	5.258	1.831	5.622	0.8989	5.579	1.122	3.124	0.4293	2.774	0.39	3.991	0.8557
MSM82-11-DR-7	Eastern Rio Grande Rise	-33.7014	-30.8633	1341	47.73	1.743	15.94	10.29	0.1334	6.401	11.84	3.24	0.6941	0.2895	1.46	98.301	36.93	40.75	339.9	375	52.94	118.4	126.8	99.11	14.25	451.5	30.84	190.3	14.7	1.094	1.526	1.262	240.8	23.26	55.43	6.857	29.27	6.833	2.385	6.818	1.073	6.582	1.275	3.552	0.4918	3.207	0.4468	4.723	0.8423
MSM82-11-DR-8	Eastern Rio Grande Rise	-33.7014	-30.8633	1341	46.11	1.595	17.12	10.4	0.1037	6.318	11.06	2.416	0.7958	0.3006	3.58	96.2191	56.42	34.19	293.3	146.2	52.74	116.3	114.4	78.91	22.41	283.7	19.32	87.77	9.237	0.4861	0.842	1.72	86.94	8.015	18.63	2.686	12.55	3.419	1.312	3.836	0.6242	3.917	0.792	2.202	0.3046	1.974	0.2788	2.442	0.6259
MSM82-11-DR-9	Eastern Rio Grande Rise	-33.7014	-30.8633	1341	48.31	1.71	16.4	8.971	0.107	6.836	11.05	2.851	0.6684	0.4207	2.4	97.3241	46.02	34.6	272.4	332.6	40.12	103.9	94.83	83.83	11.77	605.7	27.1	158.3	11.58	0.7301	1.285	1.05	172.1	17.69	39.83	5.332	23.2	5.57	1.923	5.756	0.9113	5.597	1.117	3.091	0.4257	2.738	0.3871	4.121	0.7337
MSM82-12-DR-1	Eastern Rio Grande Rise	-34.0219	-30.4736	4686	46.95	1.738	14.78	14.19	0.3216	7.052	5.858	1.65	4.046	0.4172	2.48	97.0028	21.65	33.79	294.1	206.2	40.86	52.01	250.3	206.7	87.42	160.8	21.21	34.9	12.75	0.3149	1.491	0.1548	3183	17.23	39.26	4.788	20.19	4.633	1.513	4.815	0.7588	4.678	0.897	2.41	0.3236	2.001	0.2346	1.557	0.7648
MSM82-12-DR-2	Eastern Rio Grande Rise	-34.0219	-30.4736	4686	40.18	2.77	23.16	17.1	0.984	1.504	0.7513	0.806	6.942	0.2292	5.38	94.4265	n.a.	n.a.	n.a.	n.a.	n.a.	n.a.	n.a.	n.a.	n.a.	n.a.	n.a.	n.a.	n.a.	n.a.	n.a.	n.a.	n.a.	n.a.	n.a.	n.a.	n.a.	n.a.	n.a.	n.a.	n.a.	n.a.	n.a.	n.a.	n.a.	n.a.	n.a.	n.a.	n.a.
MSM82-13-DR-1	Eastern Rio Grande Rise	-34.0006	-30.4714	3706	48.89	2.178	17.53	11.68	0.1947	6.35	2.541	5.326	0.5442	0.3534	4.16	95.5873	33.32	33.37	320	69.66	49.58	75.2	55.55	166.2	17.57	236.9	27.62	178.6	13.28	0.3948	1.522	0.7623	89.23	19.37	46.16	5.958	25.62	5.894	1.97	5.899	0.9211	5.675	1.134	3.168	0.4389	2.853	0.4017	5.214	0.8673
MSM82-24-DR-1	Western Rio Grande Rise	-31.3878	-34.0586	2223	24.43	1.738	7.119	7.889	0.1506	4.093	25.02	0.953	1.83	0.5502	26.01	73.7728	n.a.	n.a.	n.a.	n.a.	n.a.	n.a.	n.a.	n.a.	n.a.	n.a.	n.a.	n.a.	n.a.	n.a.	n.a.	n.a.	n.a.	n.a.	n.a.	n.a.	n.a.	n.a.	n.a.	n.a.	n.a.	n.a.	n.a.	n.a.	n.a.	n.a.	n.a.	n.a.	n.a.
MSM82-24-DR-1-A	Western Rio Grande Rise	-31.3878	-34.0586	2223	33.36	2.642	10.61	7.662	0.1592	4.521	21.6	3.65	0.729	0.752	13.96	85.6852	n.a.	n.a.	n.a.	n.a.	n.a.	n.a.	n.a.	n.a.	n.a.	n.a.	n.a.	n.a.	n.a.	n.a.	n.a.	n.a.	n.a.	n.a.	n.a.	n.a.	n.a.	n.a.	n.a.	n.a.	n.a.	n.a.	n.a.	n.a.	n.a.	n.a.	n.a.	n.a.	n.a.
MSM82-24-DR-4	Western Rio Grande Rise	-31.3878	-34.0586	2223	33.87	1.764	11.48	21.19	0.3976	5.653	7.201	1.032	3.549	0.5335	13.09	86.6701	n.a.	n.a.	n.a.	n.a.	n.a.	n.a.	n.a.	n.a.	n.a.	n.a.	n.a.	n.a.	n.a.	n.a.	n.a.	n.a.	n.a.	n.a.	n.a.	n.a.	n.a.	n.a.	n.a.	n.a.	n.a.	n.a.	n.a.	n.a.	n.a.	n.a.	n.a.	n.a.	n.a.
MSM82-27-DR-2	Western Rio Grande Rise	-31.0692	-34.4228	1412	40.12	2.522	13.44	10.94	0.1879	10.78	11.42	2.444	2.866	1.046	3.72	95.7659	23.02	27.17	255	466.6	47.89	221.8	45.49	76.94	63.86	1322	27.4	317.2	110.9	4.682	1.901	0.7687	882.4	110.3	206.7	22.99	84.11	12.61	3.654	9.044	1.171	6.226	1.106	2.81	0.3613	2.236	0.3004	7.116	6.912
MSM82-27-DR-1	Western Rio Grande Rise	-31.0692	-34.4228	1412	39.85	2.422	13.36	10.25	0.163	10.17	12.39	3.209	1.402	1.007	5.35	94.223	n.a.	n.a.	n.a.	n.a.	n.a.	n.a.	n.a.	n.a.	n.a.	n.a.	n.a.	n.a.	n.a.	n.a.	n.a.	n.a.	n.a.	n.a.	n.a.	n.a.	n.a.	n.a.	n.a.	n.a.	n.a.	n.a.	n.a.	n.a.	n.a.	n.a.	n.a.	n.a.	n.a.
MSM82-34-DR-2	Western Rio Grande Rise	-30.865	-35.3928	1095	44.07	3.206	16.47	9.173	0.1422	6.649	7.999	3.058	1.525	0.9913	6.31	93.2835	n.a.	n.a.	n.a.	n.a.	n.a.	n.a.	n.a.	n.a.	n.a.	n.a.	n.a.	n.a.	n.a.	n.a.	n.a.	n.a.	n.a.	n.a.	n.a.	n.a.	n.a.	n.a.	n.a.	n.a.	n.a.	n.a.	n.a.	n.a.	n.a.	n.a.	n.a.	n.a.	n.a.
MSM82-34-DR-3-B	Western Rio Grande Rise	-30.865	-35.3928	1095	46.51	2.53	18.2	8.016	0.1496	4.612	7.135	3.583	3.188	1.079	4.55	95.0026	76.65	8.985	161.8	2.321	19.48	17.01	15.4	91.29	45.19	1279	30.69	435.4	89.58	2.273	2.51	1.409	1478	99.51	199.5	21.48	80.2	12.93	3.829	9.965	1.342	7.399	1.332	3.527	0.4722	2.96	0.4059	9.596	5.031
MSM82-34-DR-3-C	Western Rio Grande Rise	-30.865	-35.3928	1095	47.14	3.086	15.33	11.09	0.163	5.288	8.01	3.284	3.027	0.7874	2.43	97.2054	85.28	21.75	337.6	64.45	43.22	70.1	45.91	99.62	61.89	784	26.42	316.4	49.88	1.909	2.226	0.5479	979.1	52.92	127.1	14.17	54.52	9.807	2.988	7.89	1.103	6.065	1.093	2.823	0.3866	2.328	0.3288	7.525	2.812
MSM82-55-DR-1	Western Rio Grande Rise	-30.4114	-36.33	1287	51.56	1.815	17.7	5.491	0.1144	2.27	4.957	4.036	5.717	1.109	4.79	94.7694	15.67	6.322	121.9	2.657	6.147	21.1	9.13	86.43	102.3	897.1	27.06	413.2	66.97	1.024	2.746	0.5938	1774	100.1	202.5	22.34	83.33	12.88	3.648	9.31	1.211	6.56	1.162	3.08	0.4175	2.683	0.3506	9.328	3.819
MSM82-55-DR-2	Western Rio Grande Rise	-30.4114	-36.33	1287	50.17	2.233	16.64	7.11	0.2455	2.897	4.906	3.498	6.039	1.025	4.81	94.7635	12.49	9.225	164.6	2.651	40.87	34.9	15.17	93.21	126.4	823.3	22.35	434	69.04	2.036	2.547	1.848	1498	84.12	168.5	19.16	71.45	11.11	3.089	8.199	1.103	6.068	1.117	2.939	0.3978	2.529	0.3442	9.891	4.217
MSM82-55-DR-5	Western Rio Grande Rise	-30.4114	-36.33	1287	43.96	2.996	15.42	9.987	0.1621	3.747	7.873	3.562	3.612	1.237	7.05	92.5561	n.a.	n.a.	n.a.	n.a.	n.a.	n.a.	n.a.	n.a.	n.a.	n.a.	n.a.	n.a.	n.a.	n.a.	n.a.	n.a.	n.a.	n.a.	n.a.	n.a.	n.a.	n.a.	n.a.	n.a.	n.a.	n.a.	n.a.	n.a.	n.a.	n.a.	n.a.	n.a.	n.a.
MSM82-55-DR-6-B	Western Rio Grande Rise	-30.4114	-36.33	1287	50.08	1.774	16.96	5.598	0.1378	2.357	6.42	4.313	5.377	0.8397	5.7	93.8565	n.a.	n.a.	n.a.	n.a.	n.a.	n.a.	n.a.	n.a.	n.a.	n.a.	n.a.	n.a.	n.a.	n.a.	n.a.	n.a.	n.a.	n.a.	n.a.	n.a.	n.a.	n.a.	n.a.	n.a.	n.a.	n.a.	n.a.	n.a.	n.a.	n.a.	n.a.	n.a.	n.a.
MSM82-55-DR-9	Western Rio Grande Rise	-30.4114	-36.33	1287	46.25	2.629	16.35	7.636	0.1234	3.013	7.245	3.526	4.891	1.464	6.42	93.1274	n.a.	n.a.	n.a.	n.a.	n.a.	n.a.	n.a.	n.a.	n.a.	n.a.	n.a.	n.a.	n.a.	n.a.	n.a.	n.a.	n.a.	n.a.	n.a.	n.a.	n.a.	n.a.	n.a.	n.a.	n.a.	n.a.	n.a.	n.a.	n.a.	n.a.	n.a.	n.a.	n.a.
MSM82-55-DR-14	Western Rio Grande Rise	-30.4114	-36.33	1287	55.15	1.438	19.23	5.709	0.07799	1.128	2.981	4.907	5.089	0.751	3.07	96.461	4.629	2.811	39.41	5.595	4.647	5.38	7.24	77.43	104.2	1139	25.07	530.2	89.06	0.471	2.855	0.667	1919	101.6	208.8	21.15	71.53	10.03	3.557	6.805	0.9506	5.322	0.9922	2.745	0.399	2.596	0.3657	10.54	4.597
MSM82-55-DR-16	Western Rio Grande Rise	-30.4114	-36.33	1287	50.3	1.768	17.29	5.37	0.1287	2.369	6.379	4.452	4.735	1.281	5.47	94.0727	n.a.	n.a.	n.a.	n.a.	n.a.	n.a.	n.a.	n.a.	n.a.	n.a.	n.a.	n.a.	n.a.	n.a.	n.a.	n.a.	n.a.	n.a.	n.a.	n.a.	n.a.	n.a.	n.a.	n.a.	n.a.	n.a.	n.a.	n.a.	n.a.	n.a.	n.a.	n.a.	n.a.
MSM82-57-DR-1	Western Rio Grande Rise	-30.3556	-36.0769	1116	52.21	2.189	17.54	7.141	0.1073	3.032	5.512	3.92	4.849	0.8134	2.29	97.3137	28.09	9.59	157.3	8.162	19.6	15.55	25.8	83.11	92.04	995.4	27.25	457.8	65.18	1.367	2.756	1.179	1417	85.68	174.3	19.32	71.98	11.57	3.33	8.5	1.144	6.266	1.114	2.952	0.394	2.487	0.3367	10.53	3.718
MSM82-58-DR-1	Western Rio Grande Rise	-30.1169	-36.3528	1505	47.73	2.723	11.25	10.34	0.1215	10.76	7.57	2.357	3.018	0.7059	2.96	96.5754	53.21	20.85	237.9	847.4	53.14	447.2	59.54	124	51.11	483.7	19.31	361.9	41.76	1.688	2.182	0.2972	709.7	55.31	113.9	13.97	55.13	9.142	2.532	6.683	0.8544	4.482	0.7824	1.945	0.2463	1.497	0.2021	8.788	2.673
MSM82-58-DR-2	Western Rio Grande Rise	-30.1169	-36.3528	1505	44.44	2.778	11.51	11.39	0.1382	10.74	7.305	2.952	3.807	0.8773	3.56	95.9375	53.77	21.42	243	848.7	59.4	496.5	79.22	111.1	54.52	494	20.68	386.9	44.04	2.009	2.308	0.5511	973.2	60.98	127.1	15.29	59.75	9.645	2.672	7.016	0.8998	4.717	0.821	2.061	0.2624	1.6	0.2154	9.482	2.766
MSM82-58-DR-3	Western Rio Grande Rise	-30.1169	-36.3528	1505	46.75	2.686	11.94	10.61	0.1412	10.29	6.418	2.819	3.281	0.894	3.69	95.8292	45.28	20.21	232.9	785.2	59.73	466.6	76.58	107.8	49.95	423.2	20.63	372.4	42.21	2.107	2.257	0.8762	862.3	50.82	122.9	14.82	57.71	9.366	2.584	6.811	0.8748	4.588	0.8071	2.03	0.2588	1.577	0.2153	9.186	2.668
MSM82-58-DR-4	Western Rio Grande Rise	-30.1169	-36.3528	1505	47.93	3.307	11.54	10.5	0.2221	9.14	6.905	2.123	4.794	0.905	2.01	97.3661	43.65	18.91	248	614.6	79.33	431	106.3	132.3	70.05	1133	23.89	445.5	47.11	2.091	3.054	0.1856	1438	72.06	143.3	17.18	67.19	10.95	2.98	7.758	0.9847	5.138	0.9054	2.273	0.2911	1.768	0.2421	11.27	2.975
MSM82-60-DR-1	Jean Charcot Seamount Chain	-29.6736	-37.0061	1952	46.51	2.627	13.16	11.54	0.1673	8.73	10.32	2.628	2.162	0.6835	1.02	98.5278	19.25	24.17	284	436.3	46.5	140.9	57.94	84.11	31.83	1034	21.59	274.6	45.86	1.947	1.921	0.4546	981.1	56.05	125.9	14.35	55.59	9.658	2.884	7.143	0.9471	5.104	0.8868	2.276	0.2965	1.851	0.2473	6.43	2.449
MSM82-60-DR-2	Jean Charcot Seamount Chain	-29.6736	-37.0061	-1952	44.5	2.587	13.2	11.84	0.1814	9.367	10.1	2.761	1.411	0.7177	2.89	96.6651	96.67	27	309.6	478.3	54.44	259.5	56.38	179.7	15.75	951.6	27.2	132.4	42.16	0.7291	1.787	0.7486	782.4	54.21	112.2	13.46	52.19	9.61	2.826	7.429	0.9806	5.389	0.9575	2.453	0.3146	1.949	0.258	5.834	2.139
MSM82-60-DR-3	Jean Charcot Seamount Chain	-29.6736	-37.0061	1952	46.07	2.649	13.54	11.07	0.1798	8.005	10.61	2.446	1.822	0.7804	2.36	97.1722	58.99	27.83	315.4	530.2	55.94	179.1	62.47	126.3	28.57	1088	25.19	150.7	48.93	1.831	1.946	1.015	1033	60.66	130.6	15.33	58.58	10.21	2.947	7.551	0.9871	5.41	0.9503	2.443	0.3164	1.973	0.262	6.66	2.475
MSM82-60-DR-6	Jean Charcot Seamount Chain	-29.6736	-37.0061	5856	44.47	2.778	14.04	12.43	0.1886	7.21	10.13	2.17	2.077	1.111	2.89	96.6046	68.42	28.04	334.7	597.2	63.12	207.6	67.79	160.2	30.31	1197	30.67	153.9	51.78	2.48	2.087	0.9481	1069	66.04	136.4	16.48	63.41	11.1	3.19	8.332	1.106	6.09	1.101	2.853	0.3748	2.325	0.3171	7.086	2.646
MSM82-65-DR-1	Jean Charcot Seamount Chain	-28.6175	-37.4339	3193	43.27	2.688	11.21	8.254	0.1894	5.849	13.72	2.014	4.605	0.8461	6.82	92.6455	22.87	25.03	233.7	505.5	40.88	107.2	81.31	80.63	93.38	1061	19.65	209.8	62.68	1.041	2.32	0.6414	1718	88.96	186	20.16	73.22	10.62	2.823	7.012	0.8727	4.585	0.7872	1.975	0.2523	1.572	0.2066	10.39	3.273
MSM82-65-DR-2	Jean Charcot Seamount Chain	-28.6175	-37.4339	3193	41.57	2.568	10.89	12.55	0.1411	12.57	10.7	1.172	1.284	0.809	5.26	94.2541	112.4	29.36	283.1	978.2	76.06	444.4	82.24	110.9	24.82	392.6	19.7	139.8	43.79	2.028	2.015	0.8625	860.7	53.19	113	13.03	50.63	8.945	2.557	6.707	0.8688	4.653	0.8004	1.991	0.2496	1.515	0.1992	7.011	2.47
MSM82-65-DR-3	Jean Charcot Seamount Chain	-28.6175	-37.4339	3193	43.5	3.127	12.66	11.6	0.1155	9.694	5.255	2.103	4.16	1.429	5.89	93.6435	n.a.	n.a.	n.a.	n.a.	n.a.	n.a.	n.a.	n.a.	n.a.	n.a.	n.a.	n.a.	n.a.	n.a.	n.a.	n.a.	n.a.	n.a.	n.a.	n.a.	n.a.	n.a.	n.a.	n.a.	n.a.	n.a.	n.a.	n.a.	n.a.	n.a.	n.a.	n.a.	n.a.
MSM82-72-DR-1	Jean Charcot Seamount Chain	-27.3503	-39.0769	2260	52.94	0.636	20.17	3.677	0.06905	1.29	3.487	4.554	6.966	0.1653	5.62	93.9544	n.a.	n.a.	n.a.	n.a.	n.a.	n.a.	n.a.	n.a.	n.a.	n.a.	n.a.	n.a.	n.a.	n.a.	n.a.	n.a.	n.a.	n.a.	n.a.	n.a.	n.a.	n.a.	n.a.	n.a.	n.a.	n.a.	n.a.	n.a.	n.a.	n.a.	n.a.	n.a.	n.a.
MSM82-72-DR-3	Jean Charcot Seamount Chain	-27.3503	-39.0769	2260	41.88	2.557	12.12	11.5	0.2273	10.73	11.76	1.656	3.258	0.858	2.93	96.5463	12.6	34.91	415.3	786.3	59.4	209	48.78	129.5	156.9	1018	33.44	217	109.1	0.4263	2.239	1.276	2411	119.7	236.6	25.94	92.99	14.18	4.041	10.13	1.311	7.234	1.292	3.352	0.4395	2.845	0.3936	9.836	4.654
MSM82-72-DR-4	Jean Charcot Seamount Chain	-27.3503	-39.0769	2260	45.7	2.192	18.53	9.025	0.1634	5.097	7.924	2.577	2.715	0.7672	4.83	94.6906	27.48	14.23	240.1	49.02	21.32	46.62	51.32	120.5	53.2	1341	26.85	264.1	127.4	0.8281	1.799	1.349	1223	110.9	210.9	21.34	72.8	10.83	3.087	7.666	1.018	5.665	1.031	2.764	0.3757	2.448	0.3371	10.14	5.941
MSM82-72-DR-5	Jean Charcot Seamount Chain	-27.3503	-39.0769	2260	43.11	2.204	17.27	8.916	0.1645	5.237	8.992	2.433	3.066	0.7253	7.48	92.1178	n.a.	n.a.	n.a.	n.a.	n.a.	n.a.	n.a.	n.a.	n.a.	n.a.	n.a.	n.a.	n.a.	n.a.	n.a.	n.a.	n.a.	n.a.	n.a.	n.a.	n.a.	n.a.	n.a.	n.a.	n.a.	n.a.	n.a.	n.a.	n.a.	n.a.	n.a.	n.a.	n.a.
MSM82-72-DR-6	Jean Charcot Seamount Chain	-27.3503	-39.0769	2260	47.13	2.156	18.67	7.998	0.1362	4.968	6.44	2.153	2.808	0.758	6.33	93.2172	n.a.	n.a.	n.a.	n.a.	n.a.	n.a.	n.a.	n.a.	n.a.	n.a.	n.a.	n.a.	n.a.	n.a.	n.a.	n.a.	n.a.	n.a.	n.a.	n.a.	n.a.	n.a.	n.a.	n.a.	n.a.	n.a.	n.a.	n.a.	n.a.	n.a.	n.a.	n.a.	n.a.
MSM82-72-DR-7	Jean Charcot Seamount Chain	-27.3503	-39.0769	2260	44.86	2.218	18.16	8.27	0.1396	5.15	7.955	2.282	2.936	0.7473	6.89	92.7179	n.a.	n.a.	n.a.	n.a.	n.a.	n.a.	n.a.	n.a.	n.a.	n.a.	n.a.	n.a.	n.a.	n.a.	n.a.	n.a.	n.a.	n.a.	n.a.	n.a.	n.a.	n.a.	n.a.	n.a.	n.a.	n.a.	n.a.	n.a.	n.a.	n.a.	n.a.	n.a.	n.a.
MSM82-72-DR-8	Jean Charcot Seamount Chain	-27.3503	-39.0769	2260	45.92	2.195	18.2	8.423	0.1411	5.201	7.211	2.383	2.871	0.7465	6.33	93.2916	n.a.	n.a.	n.a.	n.a.	n.a.	n.a.	n.a.	n.a.	n.a.	n.a.	n.a.	n.a.	n.a.	n.a.	n.a.	n.a.	n.a.	n.a.	n.a.	n.a.	n.a.	n.a.	n.a.	n.a.	n.a.	n.a.	n.a.	n.a.	n.a.	n.a.	n.a.	n.a.	n.a.
MSM82-72-DR-9	Jean Charcot Seamount Chain	-27.3503	-39.0769	2260	43.9	2.292	17.96	9.895	0.1755	5.134	7.666	2.533	3.042	0.7579	6.17	93.3554	n.a.	n.a.	n.a.	n.a.	n.a.	n.a.	n.a.	n.a.	n.a.	n.a.	n.a.	n.a.	n.a.	n.a.	n.a.	n.a.	n.a.	n.a.	n.a.	n.a.	n.a.	n.a.	n.a.	n.a.	n.a.	n.a.	n.a.	n.a.	n.a.	n.a.	n.a.	n.a.	n.a.
MSM82-72-DR-10	Jean Charcot Seamount Chain	-27.3503	-39.0769	2260	45.8	2.155	18.46	8.929	0.1447	5.038	6.975	2.454	2.878	0.7314	6	93.5651	n.a.	n.a.	n.a.	n.a.	n.a.	n.a.	n.a.	n.a.	n.a.	n.a.	n.a.	n.a.	n.a.	n.a.	n.a.	n.a.	n.a.	n.a.	n.a.	n.a.	n.a.	n.a.	n.a.	n.a.	n.a.	n.a.	n.a.	n.a.	n.a.	n.a.	n.a.	n.a.	n.a.
MSM82-72-DR-26	Jean Charcot Seamount Chain	-27.3503	-39.0769	2260	45.13	1.934	16.48	7.538	0.1617	3.035	8.742	5.419	2.928	0.8325	7.19	92.2002	n.a.	n.a.	n.a.	n.a.	n.a.	n.a.	n.a.	n.a.	n.a.	n.a.	n.a.	n.a.	n.a.	n.a.	n.a.	n.a.	n.a.	n.a.	n.a.	n.a.	n.a.	n.a.	n.a.	n.a.	n.a.	n.a.	n.a.	n.a.	n.a.	n.a.	n.a.	n.a.	n.a.
MSM82-72-DR-27	Jean Charcot Seamount Chain	-27.3503	-39.0769	2260	38.89	3.4	15.87	12.17	0.1749	6.492	12.08	1.616	1.225	1.33	6.37	93.2479	n.a.	n.a.	n.a.	n.a.	n.a.	n.a.	n.a.	n.a.	n.a.	n.a.	n.a.	n.a.	n.a.	n.a.	n.a.	n.a.	n.a.	n.a.	n.a.	n.a.	n.a.	n.a.	n.a.	n.a.	n.a.	n.a.	n.a.	n.a.	n.a.	n.a.	n.a.	n.a.	n.a.
MSM82-72-DR-28	Jean Charcot Seamount Chain	-27.3503	-39.0769	2260	46.04	2.079	18.7	8.155	0.1627	4.925	7.021	2.543	2.582	0.7058	6.66	92.9135	n.a.	n.a.	n.a.	n.a.	n.a.	n.a.	n.a.	n.a.	n.a.	n.a.	n.a.	n.a.	n.a.	n.a.	n.a.	n.a.	n.a.	n.a.	n.a.	n.a.	n.a.	n.a.	n.a.	n.a.	n.a.	n.a.	n.a.	n.a.	n.a.	n.a.	n.a.	n.a.	n.a.
MSM82-74-DR-1	Jean Charcot Seamount Chain	-26.2067	-39.1861	2722	33.38	3.305	10.7	13.1	0.2209	2.392	13.93	3.037	3.334	7.799	8.4	91.1979	n.a.	n.a.	n.a.	n.a.	n.a.	n.a.	n.a.	n.a.	n.a.	n.a.	n.a.	n.a.	n.a.	n.a.	n.a.	n.a.	n.a.	n.a.	n.a.	n.a.	n.a.	n.a.	n.a.	n.a.	n.a.	n.a.	n.a.	n.a.	n.a.	n.a.	n.a.	n.a.	n.a.
MSM82-74-DR-2	Jean Charcot Seamount Chain	-26.2067	-39.1861	2722	35.34	3.601	11.32	14.39	0.2447	2.501	11.08	3.298	3.592	6.342	7.87	91.7087	n.a.	n.a.	n.a.	n.a.	n.a.	n.a.	n.a.	n.a.	n.a.	n.a.	n.a.	n.a.	n.a.	n.a.	n.a.	n.a.	n.a.	n.a.	n.a.	n.a.	n.a.	n.a.	n.a.	n.a.	n.a.	n.a.	n.a.	n.a.	n.a.	n.a.	n.a.	n.a.	n.a.
MSM82-76-DR-1	Jean Charcot Seamount Chain	-26.2397	-39.4989	2894	43.1	2.69	9.909	14.61	0.1864	13.02	10.35	1.746	0.9826	0.6177	2.29	97.2117	32.38	32.27	300.9	1123	79.74	432.6	74.14	121.8	15.11	722.7	21.61	107.3	47.88	2.882	1.668	0.4168	398.7	39.94	90.44	10.88	43.19	8.238	2.512	6.56	0.8884	4.926	0.8687	2.208	0.2822	1.744	0.229	5.085	2.688
MSM82-76-DR-2	Jean Charcot Seamount Chain	-26.2397	-39.4989	2894	43.28	3.571	12.03	12.99	0.157	7.98	10.35	3.219	1.308	0.939	3.74	95.824	74.66	22.62	296.7	445	67.41	319.5	58.89	184.2	16.07	875.3	28.84	159.4	69.09	1.933	2.34	2.929	625.8	62.65	134.9	16.36	64.88	12.01	3.57	9.597	1.248	6.609	1.105	2.626	0.3122	1.81	0.2263	7.589	3.922
MSM82-76-DR-3	Jean Charcot Seamount Chain	-26.2397	-39.4989	2894	43.26	3.565	12.06	13.18	0.1552	8.105	10.34	3.132	1.134	0.9409	3.7	95.8721	60.48	22.63	297.7	444.2	64.55	319.7	59.53	195.4	14.07	857.1	28.96	160.5	69.23	1.818	2.356	3.15	617.4	63.05	134.7	16.4	65.21	12.11	3.601	9.642	1.257	6.663	1.112	2.635	0.3124	1.803	0.2263	7.729	3.967
MSM82-76-DR-4	Jean Charcot Seamount Chain	-26.2397	-39.4989	2894	43.7	3.627	12.16	13.42	0.1555	7.892	10.1	3.121	1.195	0.9634	3.23	96.3339	64.71	23.55	305.1	468.5	68.29	326.3	58.95	183	16.12	868	29.24	161.6	71.51	1.931	2.451	3.17	630	63.46	138.5	16.81	66.93	12.48	3.697	9.88	1.292	6.847	1.144	2.717	0.3218	1.866	0.2342	7.828	4.077
MSM82-76-DR-5	Jean Charcot Seamount Chain	-26.2397	-39.4989	2894	43.46	3.609	11.97	13.45	0.1464	8.169	9.957	3.139	1.159	0.8874	3.63	95.9468	61.21	22.72	300.2	463.2	61.76	311.7	52.87	214.7	13.91	791.1	28.58	162.2	68.86	1.721	2.383	3.291	594.6	63.21	133.3	16.25	65.42	12.22	3.58	9.824	1.278	6.756	1.126	2.665	0.315	1.831	0.2285	8.099	4.027
MSM82-76-DR-6	Jean Charcot Seamount Chain	-26.2397	-39.4989	2894	43.57	3.591	11.88	13.32	0.1616	8.322	9.944	3.032	1.245	0.9319	3.6	95.9975	65.96	22.77	301.3	449.2	68.85	327.7	67.86	188.9	15.46	796	29.95	165	70.09	2.054	2.417	2.847	598	64.64	135.6	16.58	66.77	12.42	3.633	10.03	1.298	6.875	1.151	2.728	0.3252	1.88	0.2367	8.208	4.075
MSM82-76-DR-7	Jean Charcot Seamount Chain	-26.2397	-39.4989	2894	43.4	3.687	11.83	13.64	0.1506	8.118	9.813	2.94	1.415	0.9903	3.58	95.9839	84.34	23.8	315	458.4	76.53	329.4	66.39	209.8	17.73	785.1	30.56	162.4	73.32	2.094	2.535	2.624	601.8	65.57	140.9	17.36	69.72	12.98	3.754	10.35	1.347	7.14	1.193	2.839	0.3386	1.957	0.2461	7.966	4.162
MSM82-76-DR-8	Jean Charcot Seamount Chain	-26.2397	-39.4989	2894	43.44	3.72	11.83	13.51	0.1662	8.443	9.753	3.023	1.258	0.9381	3.49	96.0813	63.38	23.88	307.2	464.8	73.39	360.1	62.74	202.1	14.73	734.8	29.43	164.2	72.05	2.265	2.503	2.872	597.9	66.08	139.9	17.07	68.41	12.81	3.685	10.28	1.338	7.097	1.177	2.792	0.3328	1.909	0.2391	8.112	4.165
MSM82-80-DR-1	Jean Charcot Seamount Chain	-26.3478	-40.0189	2671	43.35	4.147	14.42	9.679	0.232	4.333	12.17	2.294	2.168	0.9213	5.8	93.7143	7.024	17.97	294.3	83.93	44.07	58.89	109.5	104.8	32.09	1297	26.87	297	89.86	5.103	2.711	0.843	888.1	79.66	141.7	19.56	75.66	13.02	4.018	9.891	1.285	6.793	1.146	2.857	0.363	2.207	0.2849	8.639	5.08
128-1-23-24	DSDP Site 516	-30.2765	-35.285	1313	49.27	2.162	13.6	12.47	0.1815	5.317	10.11	2.728	0.3495	0.3218	3.28	96.5098	n.a.	41.73	412	42.84	42.66	48.73	n.a.	n.a.	9.111	266.9	34.29	164.7	10.96	n.a.	n.a.	n.a.	144.7	15.31	36.75	4.941	22.59	5.972	2.009	6.726	1.073	6.807	1.364	3.829	0.5376	3.479	0.4912	4.331	0.6602
128-1-58-59	DSDP Site 516	-30.2765	-35.285	1313	48.71	2.106	13.45	12.77	0.1704	5.346	9.815	2.92	0.3203	0.308	3.87	95.9157	n.a.	40.84	397.1	37.32	49.68	49.91	n.a.	n.a.	7.787	268.5	34.2	168.8	11.12	n.a.	n.a.	n.a.	160	15.24	37.26	5.029	22.95	6.061	2.026	6.726	1.074	6.808	1.357	3.798	0.5304	3.421	0.4811	4.301	0.6504
128-1-124-125	DSDP Site 516	-30.2765	-35.285	1313	48.37	2.107	13.53	12.8	0.1757	5.288	10.01	2.696	0.3146	0.4871	4	95.7784	n.a.	41.55	409	38.27	50.28	49.99	n.a.	n.a.	7.509	271.1	33.37	166.1	10.81	n.a.	n.a.	n.a.	176.7	15.22	36.76	4.903	22.44	5.908	1.98	6.683	1.056	6.713	1.337	3.762	0.5203	3.392	0.4716	4.349	0.6464
128-2-26-27	DSDP Site 516	-30.2765	-35.285	1313	48.02	2.107	13.4	13.29	0.2041	5.416	9.866	2.79	0.3337	0.3142	4.04	95.741	n.a.	41.86	410.9	40.97	51.71	52.23	n.a.	n.a.	8.809	269.6	34.86	164.9	11.15	n.a.	n.a.	n.a.	157.1	15.55	37.26	5.008	22.92	6.019	2.009	6.724	1.069	6.817	1.365	3.853	0.5381	3.488	0.4924	4.345	0.6557
128-2-37-38	DSDP Site 516	-30.2765	-35.285	1313	48.36	2.064	13.67	12.96	0.1758	5.31	9.89	2.789	0.3383	0.3124	3.91	95.8695	n.a.	40.8	396.9	41.8	49.17	51	n.a.	n.a.	8.899	266.5	34.78	167.5	11.08	n.a.	n.a.	n.a.	138.6	15.71	37.4	5.009	22.87	6.021	1.996	6.742	1.066	6.81	1.358	3.831	0.5296	3.451	0.483	4.369	0.6565
n.a. = not analysed
[truncated: 4 more columns]
